# Supplementary material for: Enhancement of photovoltaic performance by increasing conjugation of the acceptor unit in benzodithiophene and quinoxaline copolymers
Source: Royal Society of Chemistry journal article supplement (doi:10.1039/c4tc01440e), 2014-08-04
Supplement: c4tc01440e1.pdf [file c4tc01440e1.pdf]

## Supporting Information

### Enhanced Photovoltaic Performance by Increasing Conjugation of the Acceptor Unit in Benzodithiophene and Quinoxaline Copolymers

Tong Hu <sup>a,b,§</sup>, Liangliang Han <sup>b,§</sup>, Manjun Xiao <sup>b</sup>, Xichang Bao <sup>b</sup>, Ting Wang <sup>b</sup>, Mingliang Sun <sup>a\*</sup>, Renqiang Yang <sup>b\*</sup>

<sup>a</sup> Institute of Material Science and Engineering, Ocean University of China, Qingdao 266100, People's Republic of China. Fax: 86-532-66781927; Tel: 86-532-66781690; E-mail: mlsun@ouc.edu.cn

<sup>b</sup> CAS Key Laboratory of Bio-based Materials, Qingdao Institute of Bioenergy and Bioprocess Technology, Chinese Academy of Sciences, Qingdao 266101, People's Republic of China. Fax: 86-532-80662778; Tel: 86-532-80662700; E-mail: yangrq@qibebt.ac.cn

§These authors contribute equally to this work.

Figure S-1

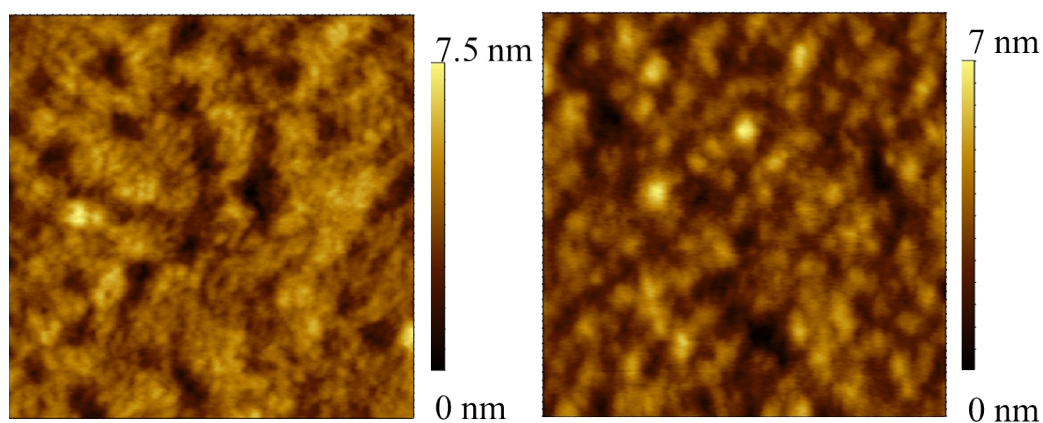

**Figure S-1** PTOBDDTTQ1/PC<sub>71</sub>BM (left) and PTOBDDTTQ2/PC<sub>71</sub>BM (right) height image respectively

Both images are 1 μm × 1 μm. Rms: 0.928 and 0.899, respectively.

---
